# Supplementary material for: Amyloidβ Peptides in interaction with raft-mime model membranes: a neutron reflectivity insight
Source: Sci Rep. 2016 Feb 16;6:20997. doi: 10.1038/srep20997 (PMC4754687; doi:10.1038/srep20997)
Supplement: Supplementary Information [file srep20997-s1.pdf]

## Supplementary Information

### Amyloid- $\beta$ Peptides in interaction with raft-mimic model membranes: a neutron reflectivity insight.

Valeria Rondelli, Paola Brocca, Simona Motta, Massimo Messa<sup>†</sup>, Laura Colombo<sup>†</sup>, Mario

Salmona<sup>†</sup>, Giovanna Fragneto<sup>‡</sup>, Laura Cantu<sup>’\*</sup>, Elena Del Favero

Dept. of Medical Biotechnologies and Translational Medicine, University of Milano, LITA, Via F.lli  
Cervi, 93. 20090 Segrate (Milano), Italy.

<sup>†</sup>Dept. of Molecular Biochemistry and Pharmacology, IRCCS Istituto di Ricerche Farmacologiche  
“Mario Negri”, Via La Masa 19, 20156 Milan, Italy.

<sup>‡</sup>Institut Laue-Langevin, 71 avenue des Martyrs, BP 156, 38000 Grenoble Cedex, France

Corresponding author:

Laura Cantu<sup>’</sup>

laura.cantu@unimi.it

**Table S1:** Theoretical SLD values of the individual chemical species

| Compound         | SLD <sup>a</sup> | Compound      | SLD <sup>a</sup> | Compound       | SLD <sup>a</sup> |
|------------------|------------------|---------------|------------------|----------------|------------------|
| H <sub>2</sub> O | -0.56            | DSPC d-chains | 7.91             | Cholesterol    | 0.22             |
| D <sub>2</sub> O | 6.35             | DSPC d-heads  | 4.87             | A $\beta$ 1-42 | 1.50             |
| Si               | 2.07             | GM1 chains    | -0.41            | A $\beta$ 1-6  | 1.75             |
| SiO <sub>2</sub> | 3.41             | GM1 heads     | 2.23             | 4-Match Water  | 4                |

<sup>a</sup> SLD values ( $10^{-6}\text{\AA}^{-2}$ ) for lipids have been calculated from Refs s1, s2 and s3, and for A $\beta$  peptides from Ref. s4 and assuming a density of  $1.5\text{ g/cm}^3$

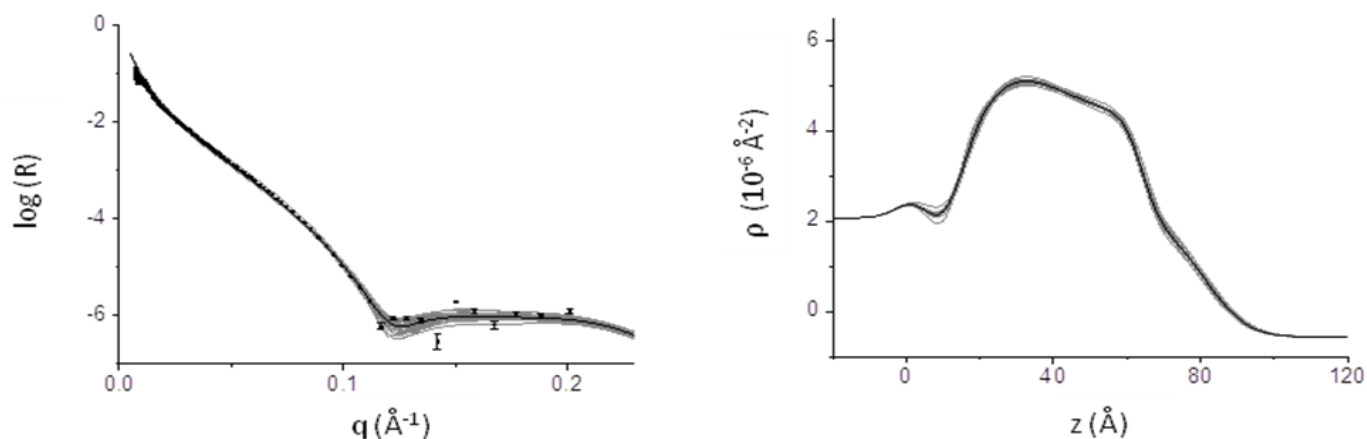

**Figure S1.** Neutron reflectivity spectrum (left panel) and contrast profile (right panel) of membrane A after the interaction with A $\beta$ 1-42 structured-oligomers in H<sub>2</sub>O at T = 22°C. In the *left panel* dots are the experimental points. In black the best fit, giving the minimum  $\chi^2$ , is reported, together with the curves, in grey, obtained by varying the fitting parameters within the errors. Errors on the fitting parameters, reported in the footnotes of Tables 1, 2 and 3 in the manuscript, have been estimated by varying each parameter until the quality of the fit was no more acceptable. On the *right panel* the contrast profile coming by the best fit is reported in black, together with the contrast profiles corresponding to the grey curves of left panel, thus representing a sort of error band to the best contrast profile.

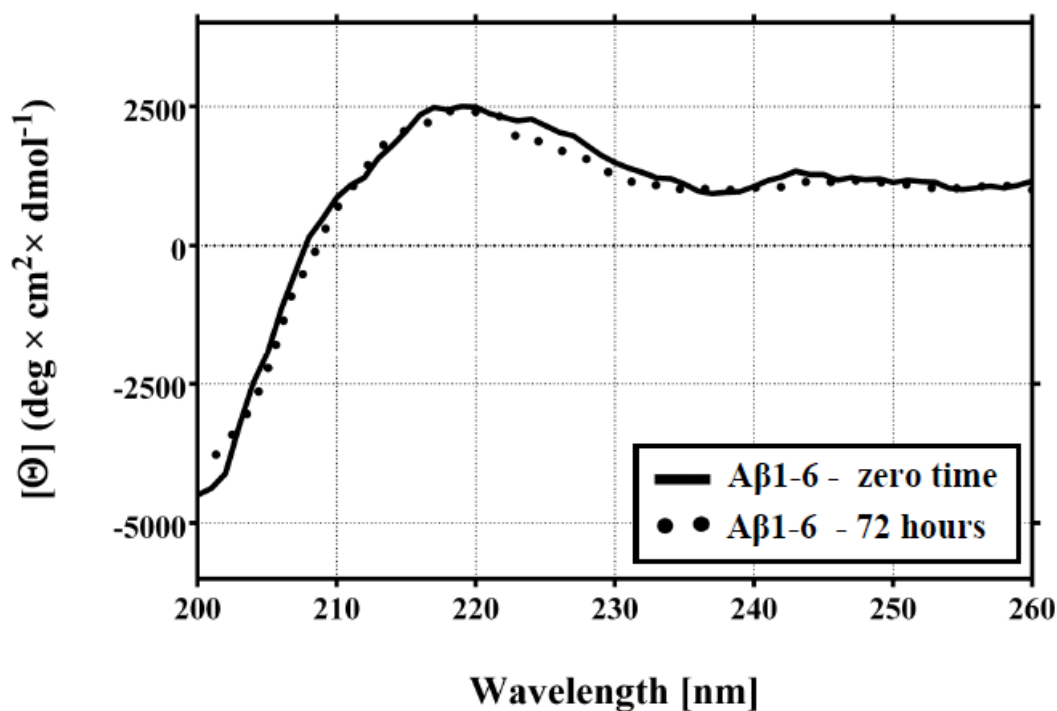

**Figure S2.** Secondary structure analysis of Aβ1-6. 100 μM Aβ1-6 peptide in 50 mM phosphate buffer containing 150 mM NaCl, pH 7.4, were analyzed at zero time and after 72-hours incubation. CD analysis showed that Aβ1-6 did not form β-sheet secondary structure, suggesting a no aggregation propensity and a high stability in solution

## References

- (s1) Nagle, J. F.; Wiener, M. C. Relations for Lipid Bilayers. *Biophysical Journal* **1989**, 55, 309–313.
- (s2) Greenwood, A. I.; Tristram-Nagle, S.; Nagle, J. F. Partial Molecular Volumes of Lipids and Cholesterol. *Chemistry and physics of lipids* **2006**, 143, 1–10.

- (s3) M. Boretta, L. Cantu, M. Corti, E. D. F. Cubic Phases of Gangliosides in Water: Possible Role of the Conformational Bistability of the Headgroup. *Physica* **1997**, 236, 162–176.
- (s4) <http://it.sw3c.com/chemical/properties/cas-107761-42-2.html>
